# Supplementary material for: Rapid electrochemical detection of MiRNA-21 facilitated by the excellent catalytic ability of Pt@CeO2 nanospheres
Source: Royal Society of Chemistry journal article supplement (doi:10.1039/d2ra01047j), 2022-01-01
Supplement: d2ra01047j1.pdf [file d2ra01047j1.pdf]

## Rapid Electrochemical Detection of MiRNA-21 Facilitated by the Excellent Catalytic Ability of Pt@CeO<sub>2</sub> Nanospheres

Peiwu Chen<sup>a,1</sup>, Lan Jiang<sup>a,1</sup>, Xianjin Xie<sup>a,1</sup>, Dong Sun<sup>1,b</sup>, Jinyao Liu<sup>a</sup>, Yuefeng Zhao<sup>a</sup>, Yuhao Li<sup>a</sup>,  
Abel Ibrahim Balbín Tamayo<sup>c,\*</sup>, Baolin Liu<sup>d,\*</sup>, Yuqing Miao<sup>a,\*</sup>, Ruizhuo Ouyang<sup>a,1,\*</sup>

<sup>a</sup>Institute of Bismuth and Rhenium Science, School of Materials and Chemistry, University of Shanghai for Science and Technology, Shanghai 200093, China

<sup>b</sup>School of Chemistry and Chemical Engineering, Henan Normal University, Xinxiang 453007, China

<sup>c</sup>Faculty of Chemistry, University of Havana, Havana 10400, Cuba

<sup>d</sup>School of Health Science and Engineering, University of Shanghai for Science and Technology, Shanghai 200093, China

The definition of the detection limit prescribed by the international union of pure and applied chemistry (IUPAC)<sup>1</sup> is as follows: detection limit, expressed as the concentration,  $C_L$ , is derived from the smallest measure and  $X_L$ , that can be detected with reasonable certainty for a given analytical procedure. The value of  $X_L$  is given by the equation  $X_L = X_{b1} + kS_{b1}$ , where  $X_{b1}$  is the mean of the blank measures,  $S_{b1}$  is the standard deviation of the blank measures and  $k$  is a numerical factor chosen according to the confidence level desired. It is strongly recommended that the value of  $k$  in the equation be 3, and it usually corresponds to a confidence level of about 90% in a practical sense. The values for  $X_L$  and  $S_{b1}$  cannot usually be determined from theory but must be found experimentally by making a sufficiently large number of measurements. Therefore, the  $C_L$  corresponds to the value calculated by the calibration plot obtained from a given analytical procedure where  $X_L = X_{b1} + 3S_{b1}$ .

In this work, after making three measurements of blank, the  $X_{b1}=18.046$  and  $S_{b1} = 0.037$  were obtained. Therefore,  $X_L = X_{b1} + 3S_{b1}=18.046 + 3 \times 0.037 = 18.157$ . The calibration plot of this proposed immunosensor is  $I = 8.765\lg C + 152.314$ . Therefore, the  $C_L = 10^{(I - 152.314)/8.765} = 1.41$  fM, where  $I$  is the  $X_L = 18.157$ . In conclusion, the detection limit of this proposed immunosensor for the detection of miRNA-21 is 1.41 fM.

---

## References

1. N. Iupac, *Spectrochim. Acta (B)*, 1978, **33**, 241-245.
